# Supplementary material
Source: Elsevier journal article supplement (https://www.sciencedirect.com/science/article/pii/S1413355518304787)
Supplement: mmc1 [file S1413355518304787:mmc1.docx]

**APPENDIX 1 MPOC-20 PORTUGUÊS-BRASIL**

No último ano, o quanto as pessoas que trabalham com sua criança...

| **Item** | **Pergunta** | **Domínio** |
| --- | --- | --- |
| 4 | ...deixaram você escolher o momento de receber informação e o tipo de informação que você queria (por exemplo, você pôde fazer perguntas no momento que você queria)? | *Empoderamento e Parceria* |
| 7 | ...explicaram completamente as opções de tratamento para você? |
| 8 | ...deram oportunidade para você tomar decisões sobre o tratamento? |
| 16 | ...forneceram informações sobre os tipos de serviços oferecidos na instituição ou em sua comunidade? | *Fornecimento de informações gerais* |
| 17 | ...disponibilizaram informações sobre a deficiência da sua criança (por exemplo, as causas, como evolui e expectativas para o futuro)? |
| 18 | ...deram oportunidade para toda a família conseguir informação? |
| 19 | ...tinham informação disponível para você na forma de cartilha, kit, folheto, vídeo, etc? |
| 20 | ...deram sugestões sobre como conseguir informação ou entrar em contato com outros pais (por exemplo, associações de pais, páginas na internet)? |
| 2 | ...forneceram informação por escrito sobre o que sua criança está fazendo na terapia? | *Fornecimento de informações específicas sobre a criança* |
| 14 | ...forneceram a você informações escritas sobre o progresso de sua criança? |
| 15 | ...falou com você sobre resultados de avaliações? |
| 5 | ...olharam para as necessidades da sua criança como um todo (por exemplo, necessidades mentais, emocionais e sociais) invés de só as necessidades físicas? | *Coordenação e Abrangência do Cuidado* |
| 6 | ...garantiram que pelo menos um profissional da equipe trabalhou com você e sua família ao longo deste ano (por exemplo, você tem uma pessoa de referência na equipe)? |
| 10 | ...planejaram juntos de forma que todos estivessem trabalhando com o mesmo objetivo? |
| 12 | ...deram para você informação que não mudou de um profissional para o outro (por exemplo, houveram opiniões semelhantes entre os profissionais)? |
| 1 | ...ajudaram você a se sentir competente como mãe ou pai (por exemplo, fizeram elogios e deram incentivos nos atendimentos)? | *Cuidado Respeitoso e Encorajador* |
| 3 | ...ofereceram um ambiente acolhedor, ao invés de só dar informação? |
| 9 | ...deram tempo suficiente para você conversar, para você não se sentir apressado (por exemplo, você pôde tirar suas dúvidas com calma durante os atendimentos)? |
| 11 | ...trataram você de igual para igual, ao invés de tratar apenas como pai ou mãe de um paciente (por exemplo, te chamaram pelo seu nome e sabiam o nome do seu filho)? |
| 13 | ...te trataram como um indivíduo ao invés de uma ‘típica’ mãe ou pai de criança com deficiência? |

**Opções de resposta:**

| **7** | **6** | **5** | **4** | **3** | **2** | **1** | **0** |
| --- | --- | --- | --- | --- | --- | --- | --- |
| Totalmente | Muitíssimo | Bastante | Mais ou menos | Pouco | Pouquís-simo | De jeito nenhum | Não se aplica |

**APPENDIX 2 MPOC-SP PORTUGUÊS-BRASIL**

No último ano, o quanto você...

| **Item** | **Pergunta** | **Domínio** |
| --- | --- | --- |
| 6 | ...aceitou pais e suas famílias sem julgamento de valores? | *Tratamento Respeitoso* |
| 7 | ...confiou nos pais como os “especialistas” em sua criança? Ou seja, entende que os pais são as pessoas que mais conhecem a criança? |
| 10 | ...garantiu que pais tivessem uma oportunidade de dizer o que era importante para eles? |
| 13 | ...respondeu completamente as perguntas dos pais? |
| 17 | ...tratou cada mãe ou pai como um indivíduo e não como um “estereótipo” de mãe ou pai de criança com “problema”? |
| 18 | ...tratou pais de igual para igual, e não apenas de maneira genérica (ex: não se referindo a eles como “Mãe” ou “Pai” e sim chamando-os pelo próprio nome)? |
| 19 | ...garantiu que os pais tivessem a oportunidade de explicar seus objetivos para o tratamento e suas necessidades? |
| 20 | ...ajudou os pais a se sentirem parceiros no cuidado com a sua criança? |
| 22 | ...tratou crianças e suas famílias como pessoas e não como ‘casos’ (não se referindo a criança e família pelo diagnóstico como ‘a diplégica espástica’)? |
| 1 | ...sugeriu tratamentos ou adequações de atividade que se encaixam com as necessidades e estilo de vida de cada família? | *Sensibilidade interpessoal* |
| 2 | ...ofereceu aos pais e crianças um retorno positivo ou encorajamento (ex.: na realização de um programa domiciliar)? |
| 3 | ...reservou tempo para estabelecer uma relação com os pais e criança? |
| 4 | ...discutiu expectativas para cada criança com outros prestadores de serviço (seja da sua categoria profissional ou não), para garantir consistência de pensamentos e ações? |
| 5 | ...informou pais sobre opções de serviços ou tratamento para a criança (ex.: equipamento, escola, terapia)? |
| 8 | ...discutiu/explorou os sentimentos de cada família sobre ter uma criança com necessidades especiais (ex: suas preocupações sobre sua saúde e a funcionalidade da criança)? |
| 9 | ...previu as preocupações dos pais oferecendo informação antes mesmo que perguntassem? |
| 11 | ...deixou os pais escolherem quando receber informação e que tipo de informação que queriam (ex. deu oportunidade para eles tirarem as dúvidas de interesse deles e no momento que eles queriam)? |
| 12 | ...ajudou cada família a manter um vínculo estável com pelo menos um profissional que acompanhe a criança e os pais por um longo período de tempo? |
| 21 | ...ajudou os pais a se sentirem competentes no seu papel como pais? |
| 14 | ...comunicou aos pais sobre resultados de testes ou avaliações? | *Comunicação de informações específicas sobre a criança* |
| 15 | ...forneceu aos pais informações escritas sobre a condição de saúde, progresso ou tratamento da criança? |
| 16 | ...comunicou aos pais detalhes sobre os serviços dados a criança, como tipo, razões, duração do tratamento ou conduta? |
| 23 | ...promoveu contato entre famílias para se socializarem, dividirem informações e experiências? | *Promovendo Informações Gerais* |
| 24 | ...deu apoio para as famílias lidarem com o impacto da condição crônica de sua criança (ex: informando os pais sobre programas de assistência ou aconselhando sobre como lidar com outros prestadores de serviço)? |
| 25 | ...deu sugestões sobre como obter informação ou entrar em contato com outros pais (ex: associações de pais, páginas na internet)? |
| 26 | ...deu oportunidade para a família inteira (todos que convivem diretamente com a criança) incluindo irmãos, para obter informação sobre a criança? |
| 27 | ...disponibilizou informações abrangentes sobre diferentes preocupações relacionadas com a realidade da criança (ex: custos financeiros ou assistência, aconselhamento genético, oportunidades para que os cuidadores possam descansar, namoro e sexualidade)? |

**Opções de resposta:**

| **7** | **6** | **5** | **4** | **3** | **2** | **1** | **0** |
| --- | --- | --- | --- | --- | --- | --- | --- |
| Totalmente | Muitíssimo | Bastante | Mais ou menos | Pouco | Pouquís-simo | De jeito nenhum | Não se aplica |
